# Supplementary material
Source: publisher figshare collection journal article supplement (https://frontiersin.figshare.com/ndownloader/files/25568537)
Supplement: Supplementary file [file 25568537]

# Dickinson et al Supplementary Figure 1

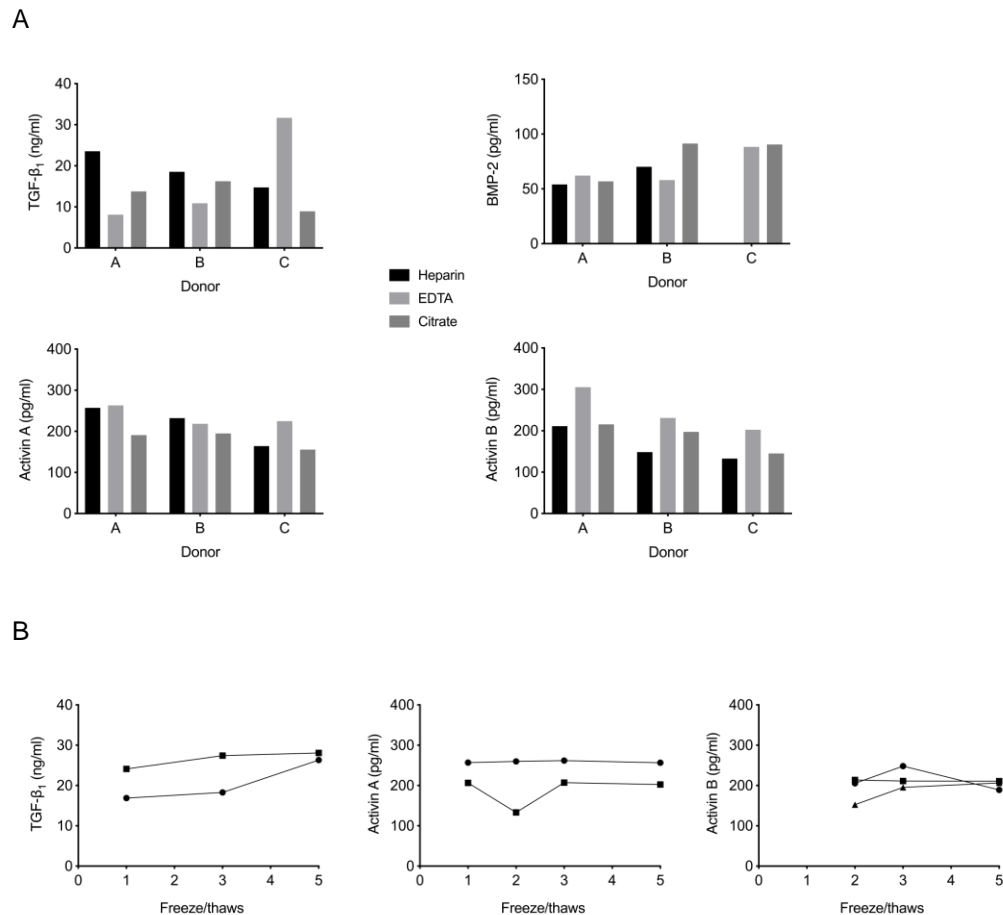

## Supplementary Figure 1: Analysis of the effects of anticoagulants and freeze-thawing on TGF- $\beta$ superfamily cytokine concentrations measured by ELISA or Luminex assay

**A.** Plasma separated from blood samples collected in heparin, EDTA or 4% sodium citrate was analyzed to determine levels of TGF- $\beta_1$  (Luminex assay), BMP-2, activin A or activin B (ELISA). Samples were assayed in technical duplicate and the results averaged. CV percentages of greater than 20% between technical replicates were rejected, resulting in the omission of one sample (BMP-2, heparin, donor C). **B.** Plasma separated from blood collected into heparin anticoagulant was spiked with recombinant TGF- $\beta_1$  (5ng/ml), activin A (100pg/ml) or activin B (100pg/ml), then serially freeze-thawed up to 5 times before measurement of those cytokines by Luminex assay or ELISA. Each unique symbol represents data from plasma from a different donor.
